## Correction: New Maximum Likelihood Estimators for Eukaryotic Intron Evolution

Hung D. Nguyen, Maki Yoshihama, Naoya Kenmochi

DOI: 10.1371/journal.pcbi.0010079

In *PLoS Computational Biology*, volume 1, issue 7:

An  $n_i$  was omitted from Equation 6. The correct equation is as shown below:

$$L(\theta, \lambda, \alpha_k, \beta_k | data) = \left( \prod_{i=0}^{2^N-1} \frac{p_i^{n_i}}{n_i!} \right) \times P!$$

This correction note may be found online at DOI: 10.1371/journal.pcbi.0020028.

Published March 31, 2006.

Citation: Correction: New maximum likelihood estimators for eukaryotic intron evolution. *PLoS Comput Biol* 2(3): e28.

## Correction: Structure Modeling of All Identified G Protein–Coupled Receptors in the Human Genome

Yang Zhang, Mark E. DeVries, Jeffrey Skolnick

DOI: 10.1371/journal.pcbi.0020013

In *PLoS Computational Biology*, volume 2, issue 2:

The URL provided for the GPCR model database in the published article is no longer active. The database is now located at <http://cssb.biology.gatech.edu/skolnick/files/gpcr/gpcr.html>.

This correction note may be found online at DOI: 10.1371/journal.pcbi.0020029.

Published March 31, 2006.

Citation: Correction: Structure modeling of all identified G protein–coupled receptors in the human genome. *PLoS Comput Biol* 2(3): e29.

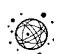

Source: http://www.ploscompbiol.org/article/fetchObject.action?uri=info%3Adoi%2F10.1371%2Fjournal.pcbi.0020028&representation=PDF
